# Supplementary figures and images for: Genome-Wide Identification and Expression Analysis of the TCP Gene Family Related to Developmental and Abiotic Stress in Ginger
Source: MDPI journal article supplement (doi:10.3390/plants12193389), 2023-09-26

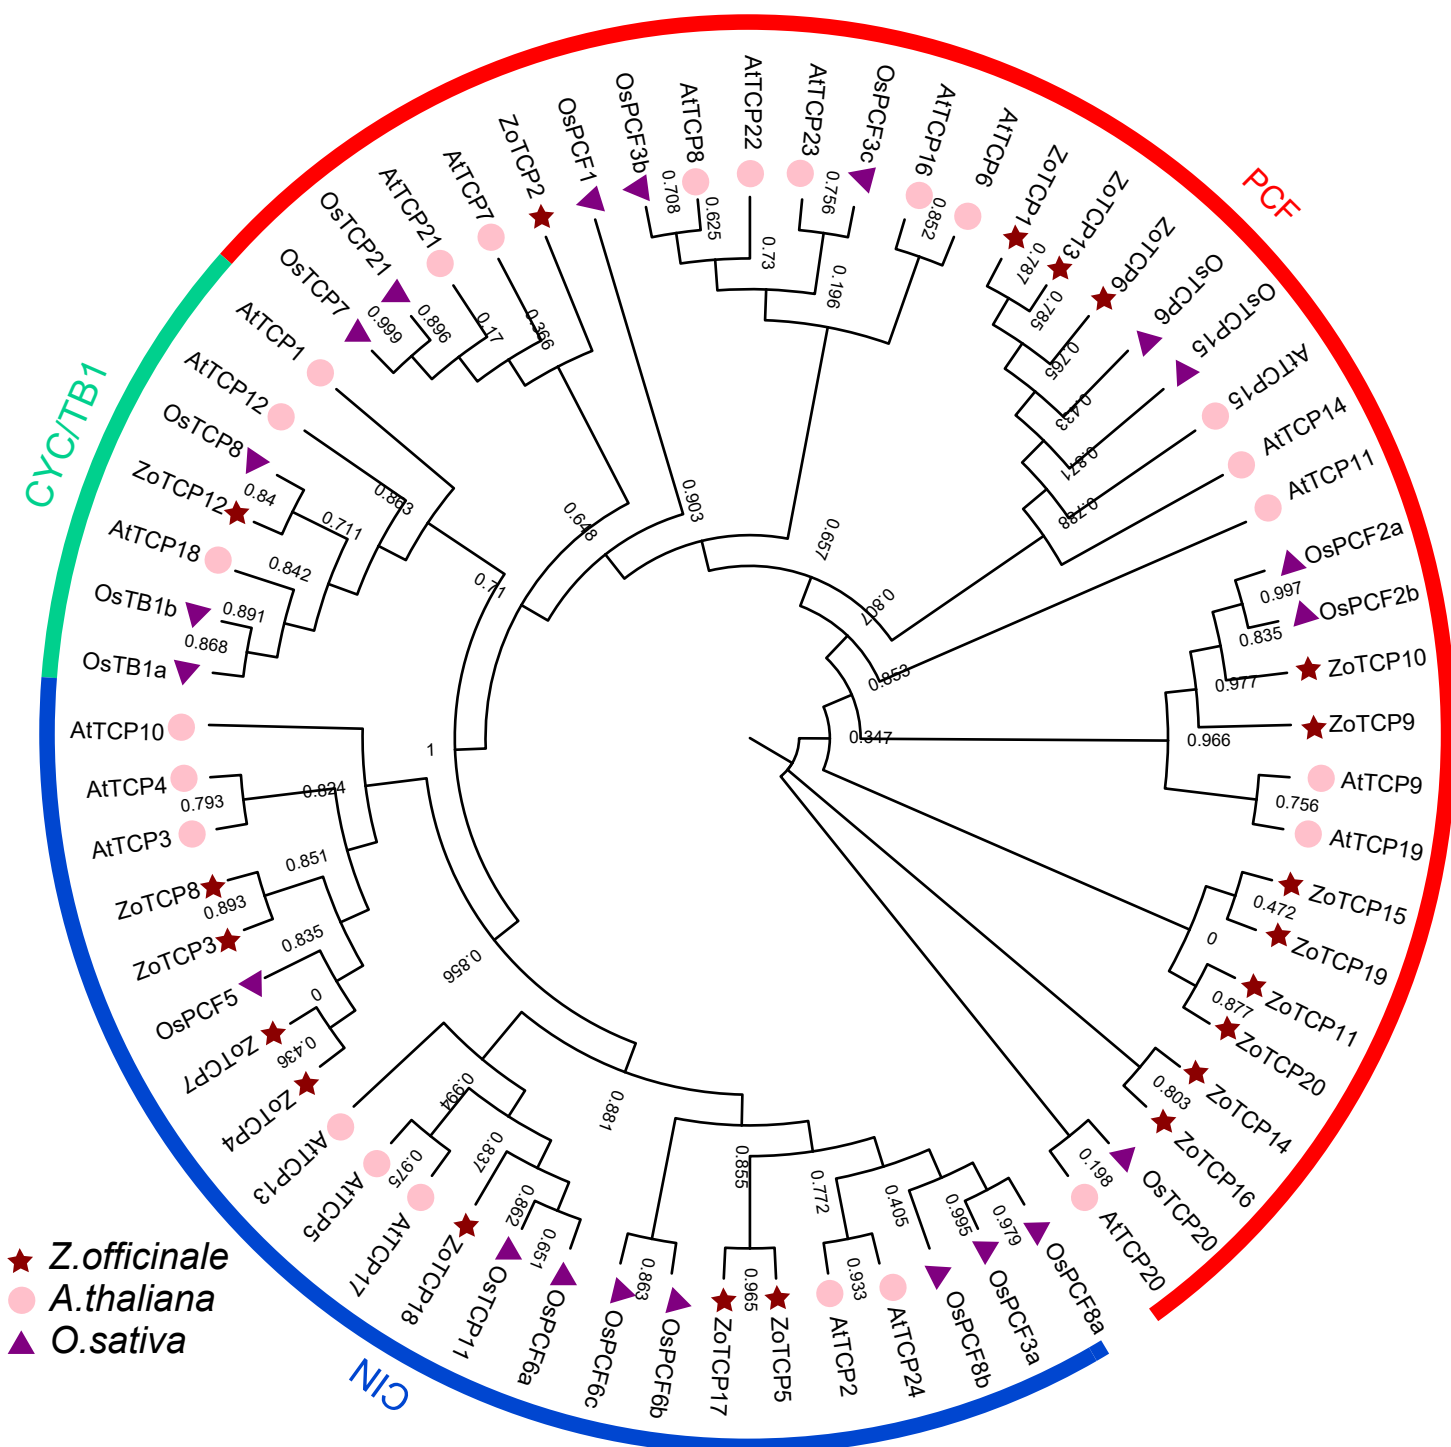

Supplement: s1 [file s1]
